# Supplementary material
Source: PubMed Central journal article supplement (PMC5303060)
Supplement: SD13.pdf [file SD13.pdf]

SUPPLEMENTAL APPENDIX

SUPPLEMENTAL TABLE A1  
Malaria knowledge score

|                                                                            | (1)                                                      |         | (2)                                                                       |         | (3)                                                                       |         | (4)                                                                                                                     |         |
|----------------------------------------------------------------------------|----------------------------------------------------------|---------|---------------------------------------------------------------------------|---------|---------------------------------------------------------------------------|---------|-------------------------------------------------------------------------------------------------------------------------|---------|
|                                                                            | Index: malaria knowledge score<br>β coefficient (95% CI) | P value | Cause of malaria?<br>Listed mosquito bites only<br>β coefficient (95% CI) | P value | Protection against malaria?<br>Listed ITNs only<br>β coefficient (95% CI) | P value | Most vulnerable to malaria effects?<br>Listed both pregnant women<br>and children under age 5<br>β coefficient (95% CI) | P value |
| Panel A: impact of Credit with Education                                   |                                                          |         |                                                                           |         |                                                                           |         |                                                                                                                         |         |
| Treatment: Credit with Education                                           | 0.140<br>(0.007, 0.274)<br>Yes                           | 0.040   | 0.023<br>(-0.046, 0.092)<br>Yes                                           | 0.509   | 0.017<br>(-0.040, 0.074)<br>Yes                                           | 0.548   | 0.076<br>(0.002, 0.151)<br>Yes                                                                                          | 0.044   |
| Control for stratification variables (wave)                                |                                                          |         |                                                                           |         |                                                                           |         |                                                                                                                         |         |
| Panel B: impact of Credit with Education and/or mixed-gender treatment     |                                                          |         |                                                                           |         |                                                                           |         |                                                                                                                         |         |
| Treatment: Credit with Education                                           | 0.131<br>(-0.053, 0.316)<br>-0.050                       | 0.162   | -0.004<br>(-0.099, 0.092)<br>-0.030                                       | 0.942   | 0.036<br>(-0.041, 0.113)<br>-0.001                                        | 0.358   | 0.077<br>(-0.028, 0.182)<br>-0.010                                                                                      | 0.148   |
| Treatment: mixed-gender group                                              | 0.016<br>(-0.243, 0.142)                                 | 0.904   | 0.057<br>(-0.127, 0.066)                                                  | 0.420   | -0.041<br>(-0.083, 0.082)                                                 | 0.988   | -0.003<br>(-0.115, 0.095)                                                                                               | 0.855   |
| Treatment: education x mixed-gender group interaction                      | 0.016<br>(-0.253, 0.285)<br>Yes                          |         | 0.057<br>(-0.082, 0.195)<br>Yes                                           |         | -0.041<br>(-0.155, 0.073)<br>Yes                                          | 0.477   | -0.003<br>(-0.154, 0.148)<br>Yes                                                                                        | 0.973   |
| Control for stratification variables (wave)                                |                                                          |         |                                                                           |         |                                                                           |         |                                                                                                                         |         |
| Panel C: heterogeneous effects by inclusion of bednet distribution         |                                                          |         |                                                                           |         |                                                                           |         |                                                                                                                         |         |
| Treatment: Credit with Education with bednet distribution (wave 1)         | 0.137<br>(-0.068, 0.342)<br>0.142                        | 0.188   | 0.045<br>(-0.077, 0.167)<br>0.008                                         | 0.469   | 0.004<br>(-0.074, 0.081)<br>0.027                                         | 0.927   | 0.068<br>(-0.051, 0.187)<br>0.082                                                                                       | 0.259   |
| Treatment: Credit with Education without bednet distribution (wave 2 or 3) | 0.112<br>(-0.034, 0.318)<br>0.00127                      |         | 0.112<br>(-0.073, 0.089)<br>0.246                                         | 0.844   | 0.844<br>(-0.053, 0.107)<br>0.173                                         | 0.507   | 0.090<br>(-0.013, 0.177)<br>0.0319                                                                                      | 0.090   |
| t test (P value) of equality of coefficients on Credit with Education      |                                                          |         |                                                                           |         |                                                                           |         |                                                                                                                         |         |
| With vs. without bednet distribution (wave 1 vs. wave 2 or 3)              | (0.972)                                                  |         | (0.621)                                                                   |         | (0.678)                                                                   |         | (0.859)                                                                                                                 |         |
| Control for stratification variables (wave)                                | Yes                                                      |         | Yes                                                                       |         | Yes                                                                       |         | Yes                                                                                                                     |         |

(continued)

SUPPLEMENTAL TABLE A1  
Continued

|                                                                                    | Index: malaria knowledge score |         | Cause of malaria?<br>Listed mosquito bites only |         | Protection against malaria?<br>Listed ITNs only |         | Most vulnerable to malaria effects?<br>Listed both pregnant women<br>and children under age 5 |         |
|------------------------------------------------------------------------------------|--------------------------------|---------|-------------------------------------------------|---------|-------------------------------------------------|---------|-----------------------------------------------------------------------------------------------|---------|
|                                                                                    | $\beta$ coefficient (95% CI)   | P value | $\beta$ coefficient (95% CI)                    | P value | $\beta$ coefficient (95% CI)                    | P value | $\beta$ coefficient (95% CI)                                                                  | P value |
|                                                                                    | (1)                            |         | (2)                                             |         | (3)                                             |         | (4)                                                                                           |         |
| Control mean = credit<br>without education,<br>female-only<br>(standard deviation) | 0                              |         | 0.525                                           |         | 0.316                                           |         | 0.505                                                                                         |         |
| Treatment mean<br>(standard deviation),<br>Credit with Education                   | (1.000)<br>0.119               |         | (0.500)<br>0.534                                |         | (0.465)<br>0.333                                |         | (0.500)<br>0.579                                                                              |         |
| Treatment mean<br>(standard deviation),<br>mixed-gender group                      | (0.965)<br>0.0225              |         | (0.499)<br>0.519                                |         | (0.471)<br>0.314                                |         | (0.494)<br>0.533                                                                              |         |
| Number of observations                                                             | (1,002)<br>3,619               |         | (0.500)<br>3,618                                |         | (0.464)<br>3,602                                |         | (0.499)<br>3,603                                                                              |         |

CI = confidence interval; ITN = insecticide-treated bednets. Sample contains 3,625 respondents present for the follow-up survey. Robust standard errors clustered at the village level. All specifications include three stratification variables to indicate whether a village participated in wave 1, 2, or 3 is nonrandom, and wave 1 treatment villages received subsidized health products, including insecticide-treated mosquito nets. The index outcome (column 1) is standardized; index component outcomes (columns 2-4) are not. Column 2: What causes malaria? = 1, if respondent lists "mosquito bites" only; Column 3: How does one protect him/herself from getting malaria? = 1, if respondent lists "young children" and "pregnant women" only; Column 4: Which two groups of people are most vulnerable to the effects of malaria? = 1, if respondent lists "young children" and "pregnant women" only.

SUPPLEMENTAL TABLE A2  
HIV/AIDS knowledge score

|                                                                               | (1)                                  | (2)                                  | (3)                                                | (4)                                                               | (5)                                                       | (6)                                                 | (7)                                                   | (8)                                        | (9)                                  |
|-------------------------------------------------------------------------------|--------------------------------------|--------------------------------------|----------------------------------------------------|-------------------------------------------------------------------|-----------------------------------------------------------|-----------------------------------------------------|-------------------------------------------------------|--------------------------------------------|--------------------------------------|
|                                                                               | Index: HIV/AIDS knowledge score      | Has heard of AIDS                    | Has heard HIV/AIDS messages in the last few months | Knows someone personally who has or is suspected to have HIV/AIDS | Using a condom every time can reduce chance of AIDS virus | Abstaining from sex can reduce chance of AIDS virus | Special meds for AIDS virus are available from doctor | Knows where she can go to get an AIDS test | Knows where she can get a condom     |
|                                                                               | $\beta$ coefficient (95% CI) P value | $\beta$ coefficient (95% CI) P value | $\beta$ coefficient (95% CI) P value               | $\beta$ coefficient (95% CI) P value                              | $\beta$ coefficient (95% CI) P value                      | $\beta$ coefficient (95% CI) P value                | $\beta$ coefficient (95% CI) P value                  | $\beta$ coefficient (95% CI) P value       | $\beta$ coefficient (95% CI) P value |
| <b>Panel A: impact of Credit with Education</b>                               |                                      |                                      |                                                    |                                                                   |                                                           |                                                     |                                                       |                                            |                                      |
| Treatment:                                                                    | 0.138                                | 0.058                                | 0.083                                              | 0.025                                                             | 0.021                                                     | 0.008                                               | 0.036                                                 | 0.178                                      | 0.063                                |
| Credit with Education                                                         | (-0.005, 0.282)                      | (-0.014, 0.082)                      | (0.028, 0.139)                                     | (0.002, 0.047)                                                    | (-0.041, 0.083)                                           | (-0.051, 0.067)                                     | (-0.017, 0.089)                                       | (-0.063, 0.055)                            | (0.002, 0.124)                       |
| Control for stratification variables (wave)                                   | Yes                                  | Yes                                  | Yes                                                | Yes                                                               | Yes                                                       | Yes                                                 | Yes                                                   | Yes                                        | Yes                                  |
| <b>Panel B: impact of Credit with Education and/or mixed-gender treatment</b> |                                      |                                      |                                                    |                                                                   |                                                           |                                                     |                                                       |                                            |                                      |
| Treatment:                                                                    | 0.060                                | 0.011                                | 0.074                                              | 0.069                                                             | 0.028                                                     | 0.066                                               | 0.073                                                 | 0.487                                      | 0.008                                |
| Credit with Education                                                         | (-0.153, 0.272)                      | (-0.061, 0.083)                      | (-0.006, 0.154)                                    | (-0.002, 0.059)                                                   | (-0.106, 0.079)                                           | (-0.119, 0.057)                                     | (-0.073, 0.089)                                       | (-0.120, 0.039)                            | (-0.034, 0.146)                      |
| Treatment: mixed-gender group                                                 | -0.084                               | -0.018                               | 0.623                                              | -0.004                                                            | 0.912                                                     | 0.746                                               | 0.348                                                 | 0.268                                      | -0.029                               |
|                                                                               | (-0.281, 0.114)                      | (-0.091, 0.054)                      | (-0.082, 0.073)                                    | (-0.029, 0.021)                                                   | (-0.117, 0.042)                                           | (-0.126, 0.035)                                     | (-0.103, 0.045)                                       | (-0.097, 0.084)                            | (-0.121, 0.051)                      |
| Treatment: education x mixed-gender group interaction                         | 0.168                                | 0.247                                | 0.020                                              | 0.723                                                             | 0.074                                                     | 0.710                                               | 0.228                                                 | 0.157                                      | 0.061                                |
|                                                                               | (-0.118, 0.453)                      | (-0.047, 0.146)                      | (-0.092, 0.133)                                    | (-0.052, 0.036)                                                   | (-0.047, 0.195)                                           | (-0.032, 0.199)                                     | (-0.044, 0.166)                                       | (-0.039, 0.197)                            | (-0.108, 0.135)                      |
| Control for stratification variables (wave)                                   | Yes                                  | Yes                                  | Yes                                                | Yes                                                               | Yes                                                       | Yes                                                 | Yes                                                   | Yes                                        | Yes                                  |
| <b>Panel C: heterogeneous effects by inclusion of bednet distribution</b>     |                                      |                                      |                                                    |                                                                   |                                                           |                                                     |                                                       |                                            |                                      |
| Treatment:                                                                    | 0.155                                | 0.113                                | 0.100                                              | 0.015                                                             | 0.060                                                     | 0.120                                               | 0.593                                                 | 0.360                                      | 0.028                                |
| Credit with Education with bednet distribution (wave 1)                       | (-0.037, 0.346)                      | (-0.027, 0.154)                      | (0.020, 0.180)                                     | (-0.016, 0.049)                                                   | (-0.016, 0.136)                                           | (-0.056, 0.098)                                     | (-0.035, 0.096)                                       | (-0.105, 0.077)                            | (-0.050, 0.105)                      |
| Treatment: Education without bednet distribution (wave 2 or 3)                | 0.127                                | 0.220                                | 0.072                                              | 0.066                                                             | 0.893                                                     | -0.001                                              | 0.980                                                 | 0.305                                      | 0.088                                |
|                                                                               | (-0.077, 0.331)                      | (-0.038, 0.065)                      | (-0.005, 0.148)                                    | (0.000, 0.061)                                                    | (-0.097, 0.085)                                           | (-0.085, 0.083)                                     | (-0.037, 0.118)                                       | (-0.075, 0.080)                            | (-0.000, 0.176)                      |

(continued)

SUPPLEMENTAL TABLE A2  
Continued

|                                                                                                                                                                                                                                                                                                                                                                                                                                                                                                  | (1)                             |         | (2)                             |         | (3)                             |         | (4)                             |         | (5)                             |         | (6)                             |         | (7)                             |         | (8)                             |         | (9)                             |         |
|--------------------------------------------------------------------------------------------------------------------------------------------------------------------------------------------------------------------------------------------------------------------------------------------------------------------------------------------------------------------------------------------------------------------------------------------------------------------------------------------------|---------------------------------|---------|---------------------------------|---------|---------------------------------|---------|---------------------------------|---------|---------------------------------|---------|---------------------------------|---------|---------------------------------|---------|---------------------------------|---------|---------------------------------|---------|
|                                                                                                                                                                                                                                                                                                                                                                                                                                                                                                  | $\beta$ coefficient<br>(95% CI) | P value |
| t test (P value)<br>of equality<br>of coefficients<br>on Credit<br>with Education<br>With vs. without<br>bednet<br>distribution<br>(wave 1 vs.<br>wave 2 or 3)<br>Control for<br>stratification<br>variables<br>(wave)<br>Control mean =<br>credit without<br>education,<br>female-only<br>(standard<br>deviation)<br>Treatment mean<br>(standard<br>deviation),<br>Credit with<br>Education<br>Treatment mean<br>(standard<br>deviation),<br>mixed-gender<br>group<br>Number of<br>observations | 0.0380                          |         | 0.903                           |         | 0.247                           |         | 0.396                           |         | 1.226                           |         | 0.144                           |         | 0.0390                          |         | 0.0703                          |         | 1.037                           |         |
|                                                                                                                                                                                                                                                                                                                                                                                                                                                                                                  | (0.846)                         |         | (0.344)                         |         | (0.620)                         |         | (0.530)                         |         | (0.270)                         |         | (0.705)                         |         | (0.844)                         |         | (0.791)                         |         | (0.311)                         |         |
|                                                                                                                                                                                                                                                                                                                                                                                                                                                                                                  | Yes                             |         | Yes                             |         | Yes                             |         | Yes                             |         | Yes                             |         | Yes                             |         | Yes                             |         | Yes                             |         | Yes                             |         |
|                                                                                                                                                                                                                                                                                                                                                                                                                                                                                                  | 0                               |         | 0.871                           |         | 0.496                           |         | 0.0577                          |         | 0.479                           |         | 0.543                           |         | 0.241                           |         | 0.468                           |         | 0.282                           |         |
|                                                                                                                                                                                                                                                                                                                                                                                                                                                                                                  | (1.000)                         |         | (0.336)                         |         | (0.500)                         |         | (0.233)                         |         | (0.500)                         |         | (0.498)                         |         | (0.428)                         |         | (0.499)                         |         | (0.450)                         |         |
|                                                                                                                                                                                                                                                                                                                                                                                                                                                                                                  | 0.106                           |         | 0.898                           |         | 0.582                           |         | 0.0806                          |         | 0.486                           |         | 0.532                           |         | 0.266                           |         | 0.461                           |         | 0.327                           |         |
|                                                                                                                                                                                                                                                                                                                                                                                                                                                                                                  | (1.027)                         |         | (0.303)                         |         | (0.493)                         |         | (0.272)                         |         | (0.500)                         |         | (0.499)                         |         | (0.442)                         |         | (0.499)                         |         | (0.469)                         |         |
|                                                                                                                                                                                                                                                                                                                                                                                                                                                                                                  | 0.0293                          |         | 0.880                           |         | 0.539                           |         | 0.0642                          |         | 0.474                           |         | 0.526                           |         | 0.247                           |         | 0.480                           |         | 0.278                           |         |
|                                                                                                                                                                                                                                                                                                                                                                                                                                                                                                  | (1.018)                         |         | (0.325)                         |         | (0.499)                         |         | (0.245)                         |         | (0.499)                         |         | (0.499)                         |         | (0.431)                         |         | (0.500)                         |         | (0.448)                         |         |
|                                                                                                                                                                                                                                                                                                                                                                                                                                                                                                  | 3,625                           |         | 3,624                           |         | 3,615                           |         | 3,563                           |         | 3,606                           |         | 3,596                           |         | 3,607                           |         | 3,603                           |         | 3,620                           |         |

AIDS = acquired immunodeficiency syndrome; CI = confidence interval; HIV = human immunodeficiency virus. Sample contains 3,625 respondents present for the follow-up survey. Robust standard errors clustered at the village level. All specifications include three stratification variables to indicate whether a village participated in wave 1, 2, or 3. Inclusion in wave 1, 2, or 3 is nonrandom, and wave 1 treatment villages received subsidized health products, including insecticide-treated mosquito nets. The index outcome (column 1) is standardized; index component outcomes (columns 2-7) are not. All questions take the value 1 if respondent answers "Yes." Column 2: Have you heard of AIDS? Column 3: In the last few months, have you heard or seen any messages on HIV/AIDS? Column 4: Do you personally know someone who is suspected to have the AIDS virus or who has the AIDS virus? Column 5: Can people reduce their chances of getting the AIDS virus by using a condom every time they have sex? Column 6: Can people reduce their chance of getting the AIDS virus by abstaining from sexual intercourse? Column 7: Are there any special medications that people infected with the AIDS virus can get from a doctor or nurse? Column 8: Do you know where people can go to get?

SUPPLEMENTAL TABLE A3  
IMCI knowledge score

|                                                                               | (1)                             |         | (2)                             |         | (3)                             |         | (4)                             |         | (5)                             |         | (6)                             |         | (7)                             |         | (8)                             |         |
|-------------------------------------------------------------------------------|---------------------------------|---------|---------------------------------|---------|---------------------------------|---------|---------------------------------|---------|---------------------------------|---------|---------------------------------|---------|---------------------------------|---------|---------------------------------|---------|
|                                                                               | $\beta$ coefficient<br>(95% CI) | P value |
| <b>Panel A: impact of Credit with Education</b>                               |                                 |         |                                 |         |                                 |         |                                 |         |                                 |         |                                 |         |                                 |         |                                 |         |
| Treatment: Credit with Education                                              | 0.036                           | 0.622   | 0.025                           | 0.563   | -0.027                          | 0.388   | 0.003                           | 0.966   | 0.052                           | 0.485   | 0.017                           | 0.376   | 0.030                           | 0.457   | 0.018                           | 0.809   |
| Control for stratification variables (wave)                                   | (-0.108, 0.180)                 |         | (-0.061, 0.111)                 |         | (-0.088, 0.034)                 |         | (-0.123, 0.128)                 |         | (-0.095, 0.199)                 |         | (-0.021, 0.055)                 |         | (-0.049, 0.108)                 |         | (-0.126, 0.162)                 |         |
|                                                                               | Yes                             |         | Yes                             |         | Yes                             |         | Yes                             |         | Yes                             |         | Yes                             |         | Yes                             |         | Yes                             |         |
| <b>Panel B: impact of Credit with Education and/or mixed-gender treatment</b> |                                 |         |                                 |         |                                 |         |                                 |         |                                 |         |                                 |         |                                 |         |                                 |         |
| Treatment: Credit with Education                                              | -0.099                          | 0.323   | -0.050                          | 0.407   | -0.042                          | 0.284   | -0.101                          | 0.249   | -0.055                          | 0.605   | 0.011                           | 0.669   | -0.045                          | 0.415   | -0.028                          | 0.778   |
| Treatment: mixed-gender group                                                 | (-0.297, 0.099)                 |         | (-0.168, 0.068)                 |         | (-0.119, 0.035)                 |         | (-0.273, 0.071)                 |         | (-0.266, 0.156)                 |         | (-0.039, 0.061)                 |         | (-0.155, 0.064)                 |         | (-0.223, 0.167)                 |         |
|                                                                               | -0.133                          | 0.216   | -0.073                          | 0.263   | 0.026                           | 0.560   | -0.127                          | 0.188   | -0.188                          | 0.100   | -0.011                          | 0.676   | -0.088                          | 0.114   | 0.018                           | 0.872   |
| Treatment: education x mixed-gender group interaction                         | (-0.345, 0.079)                 |         | (-0.202, 0.056)                 |         | (-0.063, 0.115)                 |         | (-0.317, 0.063)                 |         | (-0.413, 0.036)                 |         | (-0.065, 0.042)                 |         | (-0.197, 0.021)                 |         | (-0.206, 0.243)                 |         |
|                                                                               | 0.281                           | 0.054   | 0.155                           | 0.073   | 0.034                           | 0.586   | 0.214                           | 0.093   | 0.220                           | 0.142   | 0.012                           | 0.742   | 0.155                           | 0.054   | 0.098                           | 0.500   |
| Control for stratification variables (wave)                                   | (-0.005, 0.568)                 |         | (-0.015, 0.325)                 |         | (-0.088, 0.156)                 |         | (-0.036, 0.465)                 |         | (-0.074, 0.513)                 |         | (-0.062, 0.087)                 |         | (-0.003, 0.312)                 |         | (-0.190, 0.387)                 |         |
|                                                                               | Yes                             |         | Yes                             |         | Yes                             |         | Yes                             |         | Yes                             |         | Yes                             |         | Yes                             |         | Yes                             |         |
| <b>Panel C: heterogeneous effects by inclusion of bednet distribution</b>     |                                 |         |                                 |         |                                 |         |                                 |         |                                 |         |                                 |         |                                 |         |                                 |         |
| Treatment: Credit with Education with bednet distribution (wave 1)            | 0.072                           | 0.585   | 0.054                           | 0.456   | -0.010                          | 0.848   | -0.007                          | 0.959   | 0.029                           | 0.853   | 0.021                           | 0.477   | 0.082                           | 0.179   | 0.006                           | 0.964   |
| Treatment: Credit with Education without bednet distribution (wave 2 or 3)    | (-0.187, 0.330)                 |         | (-0.088, 0.195)                 |         | (-0.109, 0.090)                 |         | (-0.270, 0.256)                 |         | (-0.278, 0.336)                 |         | (-0.037, 0.078)                 |         | (-0.038, 0.203)                 |         | (-0.262, 0.274)                 |         |
|                                                                               | 0.012                           | 0.885   | 0.006                           | 0.910   | -0.038                          | 0.330   | 0.009                           | 0.872   | 0.068                           | 0.319   | 0.014                           | 0.568   | -0.006                          | 0.906   | 0.026                           | 0.751   |
| Control for stratification variables (wave 2 or 3)                            | (-0.154, 0.179)                 |         | (-0.101, 0.113)                 |         | (-0.116, 0.039)                 |         | (-0.104, 0.122)                 |         | (-0.066, 0.202)                 |         | (-0.035, 0.064)                 |         | (-0.108, 0.096)                 |         | (-0.133, 0.184)                 |         |

(continued)

SUPPLEMENTAL TABLE A3  
Continued

|                                                                                             | (1)                             |         | (2)                             |         | (3)                             |         | (4)                             |         | (5)                             |         | (6)                             |         | (7)                             |         | (8)                             |         |
|---------------------------------------------------------------------------------------------|---------------------------------|---------|---------------------------------|---------|---------------------------------|---------|---------------------------------|---------|---------------------------------|---------|---------------------------------|---------|---------------------------------|---------|---------------------------------|---------|
|                                                                                             | $\beta$ coefficient<br>(95% CI) | P value |
| t test (P value)<br>of equality<br>of coefficients<br>on Credit with<br>Education           | 0.147                           |         | 0.281                           |         | 0.202                           |         | 0.0124                          |         | 0.0533                          |         | 0.0239                          |         | 1.224                           |         | 0.0152                          |         |
| With vs. without<br>bednet<br>distribution<br>(wave 1 vs.<br>wave 2 or 3)                   | (0.702)                         |         | (0.597)                         |         | (0.654)                         |         | (0.912)                         |         | (0.818)                         |         | (0.872)                         |         | (0.271)                         |         | (0.902)                         |         |
| Control for<br>stratification<br>variables<br>(wave)                                        | Yes                             |         |
| Control Mean =<br>credit<br>without<br>education,<br>female-only<br>(standard<br>deviation) | 0                               |         | 1.792                           |         | 0.235                           |         | 1.982                           |         | 2.237                           |         | 0.872                           |         | 1.348                           |         | 2.133                           |         |
| Treatment<br>mean<br>(standard<br>deviation),<br>Credit with<br>Education                   | (1.000)<br>-0.0337              |         | (0.731)<br>1.778                |         | (0.424)<br>0.222                |         | (0.948)<br>1.911                |         | (1.144)<br>2.190                |         | (0.334)<br>0.884                |         | (0.543)<br>1.334                |         | (1.175)<br>2.161                |         |
| Treatment<br>mean (standard<br>deviation),<br>mixed-gender<br>group                         | (0.940)<br>-0.0486              |         | (0.717)<br>1.767                |         | (0.416)<br>0.259                |         | (0.918)<br>1.900                |         | (1.057)<br>2.124                |         | (0.320)<br>0.873                |         | (0.553)<br>1.310                |         | (1.093)<br>2.190                |         |
| Number of<br>observations                                                                   | (0.999)<br>3,356                |         | (0.716)<br>3,347                |         | (0.438)<br>3,327                |         | (0.953)<br>3,324                |         | (1.093)<br>3,331                |         | (0.333)<br>3,334                |         | (0.546)<br>3,310                |         | (1.114)<br>3,280                |         |

CI = confidence interval; IMCI = Integrated Management of Childhood Illness. Sample contains 3,625 respondents present for the follow-up survey. Robust standard errors clustered at the village level. All specifications include three stratification variables to indicate whether a village participated in wave 1, 2, or 3. Inclusion in wave 1, 2, or 3 is nonrandom, and wave 1 treatment villages received subsidized health products, including insecticide-treated mosquito nets. The index outcome (column 1) is standardized; index component outcomes (columns 2-6) are not. Component variables of IMCI knowledge score—Column 2: What are the critical danger signs of serious illness in children 2 months to 5 years of age? 1 point for each correct answer, up to 6; Column 3: How much liquid should you give a child with diarrhea? = 1, if respondent selects “more than usual”; Column 4: When a child has diarrhea, what symptoms indicate that you should take him/her for medical care? 1 point for each correct answer, up to 8; Column 5: When a child has a cough, what symptoms indicate that you should take him/her for medical care? 1 point for each correct answer, up to 10; Column 6: How do you know a child has malaria? = 1, if respondent lists “fever”; Column 7: If a child has a fever, how would you recommend that child be treated at home? 1 point for each correct answer, up to 5; Column 8: What actions should a doctor/nurse take when assessing the health of your child? 1 point for each correct answer, up to 10.

SUPPLEMENTAL TABLE A4  
Bednet behavior score

|                                                                               | Index: bednet behavior score |         | Number of mosquito nets owned by household |         | Proportion of household members under age 5 who slept under a net the previous night |         | Household has a net, 1 year or newer |         | Household has an installed net, 1 year or newer |         | Household has a net treated within the past year |         | Household used any mosquito repellents or insecticides, past 2 weeks (not in bednet behavior score index) |         |
|-------------------------------------------------------------------------------|------------------------------|---------|--------------------------------------------|---------|--------------------------------------------------------------------------------------|---------|--------------------------------------|---------|-------------------------------------------------|---------|--------------------------------------------------|---------|-----------------------------------------------------------------------------------------------------------|---------|
|                                                                               | $\beta$ coefficient (95% CI) | P value | $\beta$ coefficient (95% CI)               | P value | $\beta$ coefficient (95% CI)                                                         | P value | $\beta$ coefficient (95% CI)         | P value | $\beta$ coefficient (95% CI)                    | P value | $\beta$ coefficient (95% CI)                     | P value | $\beta$ coefficient (95% CI)                                                                              | P value |
|                                                                               | (1)                          |         | (2)                                        |         | (3)                                                                                  |         | (4)                                  |         | (5)                                             |         | (6)                                              |         | (7)                                                                                                       |         |
| <b>Panel A: impact of Credit with Education</b>                               |                              |         |                                            |         |                                                                                      |         |                                      |         |                                                 |         |                                                  |         |                                                                                                           |         |
| Treatment: Credit with Education                                              | 0.016                        | 0.798   | 0.025                                      | 0.670   | 0.006                                                                                | 0.847   | -0.014                               | 0.592   | -0.009                                          | 0.718   | 0.033                                            | 0.304   | 0.090                                                                                                     | 0.021   |
|                                                                               | (-0.107, 0.139)              |         | (-0.089, 0.138)                            |         | (-0.057, 0.070)                                                                      |         | (-0.067, 0.038)                      |         | (-0.059, 0.041)                                 |         | (-0.030, 0.096)                                  |         | (0.014, 0.167)                                                                                            |         |
| Control for stratification variables (wave)                                   | Yes                          |         | Yes                                        |         | Yes                                                                                  |         | Yes                                  |         | Yes                                             |         | Yes                                              |         | Yes                                                                                                       |         |
| <b>Panel B: impact of Credit with Education and/or mixed-gender treatment</b> |                              |         |                                            |         |                                                                                      |         |                                      |         |                                                 |         |                                                  |         |                                                                                                           |         |
| Treatment: Credit with Education                                              | 0.003                        | 0.970   | -0.000                                     | 0.998   | -0.023                                                                               | 0.622   | -0.004                               | 0.909   | 0.027                                           | 0.423   | -0.013                                           | 0.752   | 0.034                                                                                                     | 0.541   |
|                                                                               | (-0.171, 0.177)              |         | (-0.152, 0.152)                            |         | (-0.117, 0.070)                                                                      |         | (-0.081, 0.072)                      |         | (-0.040, 0.095)                                 |         | (-0.096, 0.070)                                  |         | (-0.077, 0.146)                                                                                           |         |
| Treatment: mixed-gender group                                                 | 0.089                        | 0.271   | 0.087                                      | 0.221   | -0.011                                                                               | 0.768   | 0.049                                | 0.227   | 0.062                                           | 0.093   | -0.014                                           | 0.743   | -0.087                                                                                                    | 0.077   |
|                                                                               | (-0.070, 0.248)              |         | (-0.053, 0.227)                            |         | (-0.088, 0.065)                                                                      |         | (-0.031, 0.128)                      |         | (-0.010, 0.134)                                 |         | (-0.101, 0.072)                                  |         | (-0.184, 0.010)                                                                                           |         |
| Treatment: education x mixed-gender group interaction                         | 0.033                        | 0.789   | 0.059                                      | 0.601   | 0.062                                                                                | 0.320   | -0.019                               | 0.724   | -0.076                                          | 0.131   | 0.100                                            | 0.116   | 0.118                                                                                                     | 0.124   |
|                                                                               | (-0.209, 0.275)              |         | (-0.163, 0.281)                            |         | (-0.061, 0.186)                                                                      |         | (-0.123, 0.086)                      |         | (-0.175, 0.023)                                 |         | (-0.025, 0.224)                                  |         | (-0.033, 0.268)                                                                                           |         |
| Control for stratification variables (wave)                                   | Yes                          |         | Yes                                        |         | Yes                                                                                  |         | Yes                                  |         | Yes                                             |         | Yes                                              |         | Yes                                                                                                       |         |
| <b>Panel C: heterogeneous effects by inclusion of bednet distribution</b>     |                              |         |                                            |         |                                                                                      |         |                                      |         |                                                 |         |                                                  |         |                                                                                                           |         |
| Treatment: Credit with Education with bednet distribution (wave 1)            | -0.063                       | 0.449   | -0.027                                     | 0.786   | -0.023                                                                               | 0.569   | -0.024                               | 0.594   | -0.026                                          | 0.525   | -0.022                                           | 0.603   | 0.018                                                                                                     | 0.670   |
|                                                                               | (-0.228, 0.102)              |         | (-0.223, 0.169)                            |         | (-0.104, 0.058)                                                                      |         | (-0.114, 0.066)                      |         | (-0.107, 0.055)                                 |         | (-0.103, 0.060)                                  |         | (-0.066, 0.103)                                                                                           |         |
| Treatment: Credit with Education without bednet distribution (wave 2 or 3)    | 0.072                        | 0.416   | 0.061                                      | 0.378   | 0.028                                                                                | 0.554   | -0.007                               | 0.821   | 0.003                                           | 0.931   | 0.072                                            | 0.116   | 0.142                                                                                                     | 0.016   |
|                                                                               | (-0.102, 0.246)              |         | (-0.075, 0.196)                            |         | (-0.064, 0.120)                                                                      |         | (-0.071, 0.057)                      |         | (-0.061, 0.066)                                 |         | (-0.018, 0.161)                                  |         | (0.027, 0.257)                                                                                            |         |

(continued)

SUPPLEMENTAL TABLE A4  
Continued

|                                                                           | Index: bednet behavior score | Number of mosquito nets owned by household | Proportion of household members under age 5 who slept under a net the previous night | Household has a net, 1 year or newer | Household has an installed net, 1 year or newer | Household has a net treated within the past year | Household used any mosquito repellents or insecticides, past 2 weeks (not in bednet behavior score index) |
|---------------------------------------------------------------------------|------------------------------|--------------------------------------------|--------------------------------------------------------------------------------------|--------------------------------------|-------------------------------------------------|--------------------------------------------------|-----------------------------------------------------------------------------------------------------------|
|                                                                           | $\beta$ coefficient (95% CI) | $\beta$ coefficient (95% CI)               | $\beta$ coefficient (95% CI)                                                         | $\beta$ coefficient (95% CI)         | $\beta$ coefficient (95% CI)                    | $\beta$ coefficient (95% CI)                     | $\beta$ coefficient (95% CI)                                                                              |
|                                                                           | (1)                          | (2)                                        | (3)                                                                                  | (4)                                  | (5)                                             | (6)                                              | (7)                                                                                                       |
|                                                                           | P value                      | P value                                    | P value                                                                              | P value                              | P value                                         | P value                                          | P value                                                                                                   |
| t test (P value)                                                          | 1.240                        | 0.531                                      | 0.677                                                                                | 0.0919                               | 0.308                                           | 2.314                                            | 2.939                                                                                                     |
| of equality of coefficients on Credit with Education                      |                              |                                            |                                                                                      |                                      |                                                 |                                                  |                                                                                                           |
| With vs. without bednet distribution (wave 1 vs. wave 2 or 3)             | (0.268)                      | (0.467)                                    | (0.412)                                                                              | (0.762)                              | (0.580)                                         | (0.131)                                          | (0.0890)                                                                                                  |
| Control for stratification variables (wave)                               | Yes                          | Yes                                        | Yes                                                                                  | Yes                                  | Yes                                             | Yes                                              | Yes                                                                                                       |
| Control mean = credit without education, female-only (standard deviation) | 0                            | 1.005                                      | 0.490                                                                                | 0.317                                | 0.245                                           | 0.445                                            | 0.309                                                                                                     |
| Treatment mean (standard deviation), Credit with Education                | (1.000)<br>0.0520            | (0.891)<br>1.067                           | (0.487)<br>0.485                                                                     | (0.465)<br>0.324                     | (0.430)<br>0.263                                | (0.497)<br>0.468                                 | (0.462)<br>0.364                                                                                          |
| Treatment mean (standard deviation), mixed-gender group                   | (1.034)<br>0.109             | (0.926)<br>1.123                           | (0.486)<br>0.494                                                                     | (0.468)<br>0.356                     | (0.440)<br>0.284                                | (0.499)<br>0.473                                 | (0.481)<br>0.300                                                                                          |
| Number of observations                                                    | (1.029)<br>3,625             | (0.947)<br>3,625                           | (0.488)<br>2,693                                                                     | (0.479)<br>3,599                     | (0.451)<br>3,590                                | (0.499)<br>3,574                                 | (0.458)<br>3,588                                                                                          |

CI = confidence interval. Sample contains 3,625 respondents present for the follow-up survey. Robust standard errors clustered at the village level. All specifications include three stratification variables to indicate whether a village participated in wave 1, 2, or 3. Inclusion in wave 1, 2, or 3 is nonrandom, and wave 1 treatment villages received subsidized health products, including insecticide-treated mosquito nets. The index outcome (column 1) is standardized; index component outcomes (columns 2-6) are not. As mosquito repellent usage is a substitute behavior for bednet usage, column 7 is provided for comparison only and not included in the bednet behavior index. Component variables of bednet behavior score—Column 2: number of mosquito nets owned (not necessarily installed) by household; Column 3: proportion of household members under age 5 who slept under a net the previous night; Column 4: household has a net, 1 year or newer; Column 5: household has an installed net, 1 year or newer; Column 6: household has a net treated within the past year.



SUPPLEMENTAL TABLE A5  
HIV/AIDS access and behavior score

|                                                                               | Index: HIV/AIDS access and behavior score |         | Has spoken to husband about not getting AIDS |         | Used a condom during last sexual intercourse |         | Is able to get a condom herself |         |
|-------------------------------------------------------------------------------|-------------------------------------------|---------|----------------------------------------------|---------|----------------------------------------------|---------|---------------------------------|---------|
|                                                                               | $\beta$ coefficient (95% CI)              | P value | $\beta$ coefficient (95% CI)                 | P value | $\beta$ coefficient (95% CI)                 | P value | $\beta$ coefficient (95% CI)    | P value |
|                                                                               | (1)                                       |         | (2)                                          |         | (3)                                          |         | (4)                             |         |
| <b>Panel A: impact of Credit with Education</b>                               |                                           |         |                                              |         |                                              |         |                                 |         |
| Treatment: Credit with Education                                              | 0.139                                     | 0.035   | 0.026                                        | 0.290   | 0.007                                        | 0.302   | 0.055                           | 0.016   |
|                                                                               | (0.010, 0.268)                            |         | (-0.022, 0.074)                              |         | (-0.006, 0.020)                              |         | (0.010, 0.099)                  |         |
| Control for stratification variables (wave)                                   | Yes                                       |         | Yes                                          |         | Yes                                          |         | Yes                             |         |
| <b>Panel B: impact of Credit with Education and/or mixed-gender treatment</b> |                                           |         |                                              |         |                                              |         |                                 |         |
| Treatment: Credit with Education                                              | 0.140                                     | 0.129   | 0.022                                        | 0.533   | 0.007                                        | 0.469   | 0.060                           | 0.067   |
|                                                                               | (-0.041, 0.322)                           |         | (-0.048, 0.093)                              |         | (-0.012, 0.025)                              |         | (-0.004, 0.125)                 |         |
| Treatment: mixed-gender group                                                 | 0.017                                     | 0.828   | 0.001                                        | 0.976   | 0.004                                        | 0.590   | 0.001                           | 0.980   |
|                                                                               | (-0.140, 0.175)                           |         | (-0.062, 0.064)                              |         | (-0.012, 0.020)                              |         | (-0.056, 0.058)                 |         |
| Treatment: education x mixed-gender group interaction                         | -0.001                                    | 0.994   | 0.008                                        | 0.875   | 0.001                                        | 0.956   | -0.012                          | 0.799   |
|                                                                               | (-0.262, 0.260)                           |         | (-0.089, 0.105)                              |         | (-0.026, 0.027)                              |         | (-0.101, 0.078)                 |         |
| Control for stratification variables (wave)                                   | Yes                                       |         | Yes                                          |         | Yes                                          |         | Yes                             |         |
| <b>Panel C: heterogeneous effects by inclusion of bednet distribution</b>     |                                           |         |                                              |         |                                              |         |                                 |         |
| Treatment: Credit with Education with bednet distribution (wave 1)            | 0.112                                     | 0.195   | 0.038                                        | 0.177   | 0.003                                        | 0.732   | 0.037                           | 0.274   |
|                                                                               | (-0.058, 0.282)                           |         | (-0.018, 0.094)                              |         | (-0.014, 0.020)                              |         | (-0.030, 0.105)                 |         |
| Treatment: Credit with Education without bednet distribution (wave 2 or 3)    | 0.158                                     | 0.092   | 0.017                                        | 0.643   | 0.010                                        | 0.314   | 0.067                           | 0.026   |
|                                                                               | (-0.027, 0.343)                           |         | (-0.055, 0.089)                              |         | (-0.009, 0.029)                              |         | (0.008, 0.126)                  |         |
| t test (P value) of equality of coefficients on Credit with Education         | 0.136                                     |         | 0.210                                        |         | 0.270                                        |         | 0.431                           |         |
| With vs. without bednet distribution (wave 1 vs. wave 2 or 3)                 | (0.713)                                   |         | (0.647)                                      |         | (0.604)                                      |         | (0.513)                         |         |
| Control for stratification variables (wave)                                   | Yes                                       |         | Yes                                          |         | Yes                                          |         | Yes                             |         |
| Control mean = credit without education, women only (standard deviation)      | 0                                         |         | 0.198                                        |         | 0.0187                                       |         | 0.133                           |         |
|                                                                               | (1.000)                                   |         | (0.398)                                      |         | (0.136)                                      |         | (0.339)                         |         |
| Treatment mean (standard deviation), Credit with Education                    | 0.151                                     |         | 0.225                                        |         | 0.0284                                       |         | 0.188                           |         |
|                                                                               | (1.184)                                   |         | (0.418)                                      |         | (0.166)                                      |         | (0.391)                         |         |
| Treatment mean (standard deviation), mixed-gender group                       | 0.0884                                    |         | 0.213                                        |         | 0.0276                                       |         | 0.157                           |         |
|                                                                               | (1.114)                                   |         | (0.410)                                      |         | (0.164)                                      |         | (0.364)                         |         |
| Number of observations                                                        | 3,624                                     |         | 3,588                                        |         | 3,622                                        |         | 3,619                           |         |

AIDS = acquired immunodeficiency syndrome; CI = confidence interval; HIV = human immunodeficiency virus. Sample contains 3,625 respondents present for the follow-up survey. Robust standard errors clustered at the village level. All specifications include three stratification variables to indicate whether a village participated in wave 1, 2, or 3. Inclusion in wave 1, 2, or 3 is nonrandom, and wave 1 treatment villages received subsidized health products, including insecticide-treated mosquito nets. The index outcome (column 1) is standardized; index component outcomes (columns 2–4) are not. Component variables of HIV/AIDS behavior score—All questions take the value 1, if respondent answers “Yes.” Column 2: Have you spoken with your husband/companion about ways to avoid contracting HIV/AIDS? Column 3: The last time you had sexual intercourse, was a condom used? Column 4: If you wanted to, could you yourself get a condom?

SUPPLEMENTAL TABLE A6  
IMCI behavior score

|                                                                            | Index: IMCI behavior score   |         | Has ever given Orasel or other oral rehydration salts to a child to treat diarrhea |         | Sought treatment within 3 days for a child who had fever in the previous month |         |
|----------------------------------------------------------------------------|------------------------------|---------|------------------------------------------------------------------------------------|---------|--------------------------------------------------------------------------------|---------|
|                                                                            | $\beta$ coefficient (95% CI) | P value | $\beta$ coefficient (95% CI)                                                       | P value | $\beta$ coefficient (95% CI)                                                   | P value |
|                                                                            | (1)                          |         | (2)                                                                                |         | (3)                                                                            |         |
| Panel A: impact of Credit with Education                                   |                              |         |                                                                                    |         |                                                                                |         |
| Treatment: Credit with Education                                           | 0.019                        | 0.795   | 0.002                                                                              | 0.948   | 0.052                                                                          | 0.323   |
| Control for stratification variables (wave)                                | (-0.123, 0.160)              |         | (-0.069, 0.073)                                                                    |         | (-0.052, 0.156)                                                                |         |
| Yes                                                                        |                              |         | Yes                                                                                |         | Yes                                                                            |         |
| Panel B: impact of Credit with Education and/or mixed-gender treatment     |                              |         |                                                                                    |         |                                                                                |         |
| Treatment: Credit with Education                                           | 0.033                        | 0.730   | 0.006                                                                              | 0.899   | 0.042                                                                          | 0.529   |
| Treatment: mixed-gender group                                              | (-0.158, 0.225)              |         | (-0.090, 0.102)                                                                    |         | (-0.091, 0.175)                                                                |         |
|                                                                            | 0.097                        | 0.374   | 0.042                                                                              | 0.437   | 0.050                                                                          | 0.495   |
| Treatment: education $\times$ mixed-gender group interaction               | (-0.118, 0.312)              |         | (-0.065, 0.149)                                                                    |         | (-0.096, 0.196)                                                                |         |
|                                                                            | -0.027                       | 0.851   | -0.006                                                                             | 0.931   | 0.026                                                                          | 0.802   |
| Control for stratification variables (wave)                                | (-0.311, 0.257)              |         | (-0.149, 0.136)                                                                    |         | (-0.181, 0.234)                                                                |         |
| Yes                                                                        |                              |         | Yes                                                                                |         | Yes                                                                            |         |
| Panel C: heterogeneous effects by inclusion of bednet distribution         |                              |         |                                                                                    |         |                                                                                |         |
| Treatment: Credit with Education with bednet distribution (wave 1)         | 0.125                        | 0.282   | 0.059                                                                              | 0.292   | 0.115                                                                          | 0.232   |
| Treatment: Credit with Education without bednet distribution (wave 2 or 3) | (-0.104, 0.355)              |         | (-0.051, 0.169)                                                                    |         | (-0.075, 0.305)                                                                |         |
|                                                                            | -0.051                       | 0.569   | -0.035                                                                             | 0.455   | 0.021                                                                          | 0.737   |
| t test (P value) of equality of coefficients on Credit with Education      | (-0.228, 0.126)              |         | (-0.126, 0.057)                                                                    |         | (-0.103, 0.145)                                                                |         |
|                                                                            | 1.451                        |         | 1.673                                                                              |         | 0.677                                                                          |         |
| With vs. without bednet distribution (wave 1 vs. wave 2 or 3)              | (0.231)                      |         | (0.198)                                                                            |         | (0.412)                                                                        |         |
| Control for stratification variables (wave)                                | Yes                          |         | Yes                                                                                |         | Yes                                                                            |         |
| Control mean = credit without education, female-only (standard deviation)  | 0                            |         | 0.566                                                                              |         | 0.489                                                                          |         |
| Treatment mean (standard deviation), Credit with Education                 | (1.000)                      |         | (0.496)                                                                            |         | (0.503)                                                                        |         |
|                                                                            | 0.0790                       |         | 0.595                                                                              |         | 0.572                                                                          |         |
| Treatment mean (standard deviation), mixed-gender group                    | (1.164)                      |         | (0.576)                                                                            |         | (0.496)                                                                        |         |
|                                                                            | 0.109                        |         | 0.613                                                                              |         | 0.573                                                                          |         |
| Number of observations                                                     | (1.323)                      |         | (0.650)                                                                            |         | (0.496)                                                                        |         |
|                                                                            | 3,270                        |         | 3,253                                                                              |         | 429                                                                            |         |

CI = confidence interval; IMCI = Integrated Management of Childhood Illness. Sample contains 3,625 respondents present for the follow-up survey. Robust standard errors clustered at the village level. All specifications include three stratification variables to indicate whether a village participated in wave 1, 2, or 3. Inclusion in wave 1, 2, or 3 is nonrandom, and wave 1 treatment villages received subsidized health products, including insecticide-treated mosquito nets. The index outcome (column 1) is standardized; index component outcomes (columns 2 and 3) are not. Component variables of IMCI behavior score—Column 2: Have you ever given Orasel or other oral rehydration salts to your children to treat diarrhea? Column 3: respondent sought treatment within 3 days for a child who had fever during the previous month.

SUPPLEMENTAL TABLE A7  
Empowerment score

|                                                                               | (1)                       |         | (2)                       |         | (3)                       |         | (4)                       |         | (5)                       |         | (6)                       |         | (7)                       |         | (8)                       |         |
|-------------------------------------------------------------------------------|---------------------------|---------|---------------------------|---------|---------------------------|---------|---------------------------|---------|---------------------------|---------|---------------------------|---------|---------------------------|---------|---------------------------|---------|
|                                                                               | β coefficient<br>(95% CI) | P value |
| <b>Panel A: impact of mixed-gender group</b>                                  |                           |         |                           |         |                           |         |                           |         |                           |         |                           |         |                           |         |                           |         |
| Treatment: mixed-gender group                                                 | -0.097                    | 0.179   | -0.052                    | 0.079   | -0.047                    | 0.078   | -0.032                    | 0.271   | -0.046                    | 0.112   | -0.063                    | 0.538   | -0.036                    | 0.661   | -0.036                    | 0.830   |
| Control for stratification variables (wave)                                   | (-0.238, 0.045)           |         | (-0.109, 0.006)           |         | (-0.100, 0.005)           |         | (-0.091, 0.026)           |         | (-0.104, 0.011)           |         | (-0.266, 0.139)           |         | (-0.199, 0.127)           |         | (-0.371, 0.298)           |         |
|                                                                               | Yes                       |         | Yes                       |         | Yes                       |         | Yes                       |         | Yes                       |         | Yes                       |         | Yes                       |         | Yes                       |         |
| <b>Panel B: impact of Credit with Education and/or mixed-gender treatment</b> |                           |         |                           |         |                           |         |                           |         |                           |         |                           |         |                           |         |                           |         |
| Treatment: Credit with Education                                              | 0.036                     | 0.720   | 0.033                     | 0.448   | 0.056                     | 0.172   | 0.037                     | 0.389   | 0.019                     | 0.666   | -0.069                    | 0.647   | -0.044                    | 0.706   | 0.041                     | 0.850   |
| Control for stratification variables (wave)                                   | (-0.163, 0.236)           |         | (-0.053, 0.118)           |         | (-0.025, 0.137)           |         | (-0.047, 0.121)           |         | (-0.067, 0.105)           |         | (-0.366, 0.228)           |         | (-0.273, 0.185)           |         | (-0.390, 0.472)           |         |
|                                                                               | -0.038                    | 0.689   | -0.018                    | 0.622   | -0.002                    | 0.944   | 0.018                     | 0.670   | -0.024                    | 0.556   | -0.050                    | 0.730   | -0.128                    | 0.244   | 0.059                     | 0.794   |
| Treatment: mixed-gender group                                                 | (-0.227, 0.151)           |         | (-0.092, 0.055)           |         | (-0.072, 0.067)           |         | (-0.064, 0.099)           |         | (-0.105, 0.057)           |         | (-0.338, 0.238)           |         | (-0.345, 0.089)           |         | (-0.389, 0.508)           |         |
|                                                                               | -0.121                    | 0.398   | -0.069                    | 0.230   | -0.091                    | 0.084   | -0.103                    | 0.078   | -0.046                    | 0.429   | -0.031                    | 0.882   | 0.192                     | 0.246   | -0.199                    | 0.557   |
| Treatment: education x mixed-gender group interaction                         | (-0.403, 0.161)           |         | (-0.181, 0.044)           |         | (-0.195, 0.012)           |         | (-0.218, 0.012)           |         | (-0.161, 0.069)           |         | (-0.436, 0.375)           |         | (-0.134, 0.518)           |         | (-0.870, 0.471)           |         |
|                                                                               | Yes                       |         | Yes                       |         | Yes                       |         | Yes                       |         | Yes                       |         | Yes                       |         | Yes                       |         | Yes                       |         |
| Control for stratification variables (wave)                                   | 0                         |         | 0.451                     |         | 0.436                     |         | 0.481                     |         | 0.502                     |         | 7.361                     |         | 7.548                     |         | 9.062                     |         |
| Control mean = credit without education, female-only (standard deviation)     | (1.000)                   |         | (0.498)                   |         | (0.496)                   |         | (0.500)                   |         | (0.500)                   |         | (1.505)                   |         | (0.912)                   |         | 2.049                     |         |
|                                                                               | -0.0358                   |         | 0.444                     |         | 0.449                     |         | 0.480                     |         | 0.490                     |         | 7.250                     |         | 7.533                     |         | 9.040                     |         |
| Treatment mean (standard deviation), Credit with Education                    | (1.069)                   |         | (0.497)                   |         | (0.498)                   |         | (0.500)                   |         | (0.500)                   |         | (1.532)                   |         | (0.949)                   |         | 2.195                     |         |
|                                                                               |                           |         |                           |         |                           |         |                           |         |                           |         |                           |         |                           |         |                           | 0.427   |

(continued)

**SUPPLEMENTAL TABLE A7**  
**Continued**

|                                                                     | (1)                             |         | (2)                             |         | (3)                             |         | (4)                             |         | (5)                             |         | (6)                             |         | (7)                             |         | (8)                             |         | (9)                             |         |       |
|---------------------------------------------------------------------|---------------------------------|---------|---------------------------------|---------|---------------------------------|---------|---------------------------------|---------|---------------------------------|---------|---------------------------------|---------|---------------------------------|---------|---------------------------------|---------|---------------------------------|---------|-------|
|                                                                     | $\beta$ coefficient<br>(95% CI) | P value |       |
| Treatment mean<br>(standard<br>deviation),<br>mixed-gender<br>group | -0.0756                         |         | 0.415                           |         | 0.417                           |         | 0.468                           |         | 0.466                           |         | 7.266                           |         | 7.487                           |         | 9.058                           |         | 1.814                           |         |       |
| Number of<br>observations                                           | (1.078)                         |         | (0.493)                         |         | (0.493)                         |         | (0.499)                         |         | (0.499)                         |         | (1.527)                         |         | (0.950)                         |         | 2.244                           |         | 0.424                           |         | 3,560 |

CI = confidence interval. Sample contains 3,625 respondents present for the follow-up survey. Robust standard errors clustered at the village level. All specifications include three stratification variables to indicate whether a village participated in wave 1, 2, or 3. Inclusion in wave 1, 2, or 3 is nonrandom, and wave 1 treatment villages received subsidized health products, including insecticide-treated mosquito nets. The index outcome (column 1) is standardized, index component outcomes (columns 2–9) are not. Component variables of the empowerment score—Column 2: participates in decisions about children's membership in groups; Column 3: participates in decisions about children's membership in groups; Column 4: participates in buying and selling decisions for the household; Column 5: participates in decisions about working outside the household; Column 6: How often do conflicts with your spouse lead to a) verbal abuse, b) physical abuse, or c) physical abuse against children? For each of a, b, and c, 0 = often, 1 = sometimes, 2 = rarely, 3 = never. Combined score: 0 = often to 9 = never. Column 7: ability to go out to a) the market, b) the health center, c) walk with friends, d) the religious center. For each of a, b, c, and d, 0 = never, 1 = cannot when alone, 2 = can when alone. Combined score: 0 = never to 8 = always able to travel alone; Column 8: views on women's empowerment: a) decisions in the family should be taken by men, b) if a woman works outside the home, then the husband should help with household chores, c) a married woman must be able to work outside the home if she wishes, d) a married woman should be allowed to express her opinion even when she disagrees with her husband, e) a woman should accept beatings by her husband to preserve the unity of the family, and f) it is better to send boys to school than girls. For b, c, and d, Yes = 0, No = 1, Depends = 1, and for a, e, and f, Yes = 0, No = 2, Depends = 1. Combined score: 0 = low empowerment, 12 = high empowerment; Column 9: frequency of voting: 0 = never, 1 = sometimes, 2 = always.

SUPPLEMENTAL TABLE A8

## Social network score

|                                                                           | Index: social network score  |         | Number of matched respondents who have given economic support, out of 10 |         | Number of matched respondents she could ask for small money, out of 10 |         | Number of matched respondents she would lend small money, out of 10 |         |
|---------------------------------------------------------------------------|------------------------------|---------|--------------------------------------------------------------------------|---------|------------------------------------------------------------------------|---------|---------------------------------------------------------------------|---------|
|                                                                           | $\beta$ coefficient (95% CI) |         | $\beta$ coefficient (95% CI)                                             |         | $\beta$ coefficient (95% CI)                                           |         | $\beta$ coefficient (95% CI)                                        |         |
|                                                                           | (1)                          | P value | (2)                                                                      | P value | (3)                                                                    | P value | (4)                                                                 | P value |
| Panel A: impact of mixed-gender group                                     |                              |         |                                                                          |         |                                                                        |         |                                                                     |         |
| Treatment: mixed-gender group                                             | -0.028                       | 0.795   | 0.007                                                                    | 0.968   | -0.101                                                                 | 0.762   | -0.124                                                              | 0.721   |
|                                                                           | (-0.238, 0.183)              |         | (-0.325, 0.338)                                                          |         | (-0.760, 0.558)                                                        |         | (-0.813, 0.564)                                                     |         |
| Control for stratification variables (wave)                               | Yes                          |         | Yes                                                                      |         | Yes                                                                    |         | Yes                                                                 |         |
| Panel B: impact of Credit with Education and/or mixed-gender treatment    |                              |         |                                                                          |         |                                                                        |         |                                                                     |         |
| Treatment: Credit with Education                                          | -0.193                       | 0.189   | -0.145                                                                   | 0.546   | -0.624                                                                 | 0.166   | -0.693                                                              | 0.149   |
|                                                                           | (-0.482, 0.096)              |         | (-0.618, 0.328)                                                          |         | (-1.511, 0.262)                                                        |         | (-1.638, 0.251)                                                     |         |
| Treatment: mixed-gender group                                             | -0.129                       | 0.405   | -0.002                                                                   | 0.994   | -0.476                                                                 | 0.334   | -0.553                                                              | 0.290   |
|                                                                           | (-0.435, 0.177)              |         | (-0.450, 0.447)                                                          |         | (-1.449, 0.496)                                                        |         | (-1.583, 0.477)                                                     |         |
| Treatment: education $\times$ mixed-gender group interaction              | 0.203                        | 0.331   | 0.010                                                                    | 0.974   | 0.756                                                                  | 0.256   | 0.865                                                               | 0.215   |
|                                                                           | (-0.209, 0.615)              |         | (-0.606, 0.627)                                                          |         | (-0.554, 2.065)                                                        |         | (-0.509, 2.239)                                                     |         |
| Control for stratification variables (wave)                               | Yes                          |         | Yes                                                                      |         | Yes                                                                    |         | Yes                                                                 |         |
| Control mean = credit without education, female-only (standard deviation) | 0                            |         | 1.185                                                                    |         | 4.046                                                                  |         | 4.494                                                               |         |
|                                                                           | (1.000)                      |         | (1.940)                                                                  |         | (3.246)                                                                |         | (3.336)                                                             |         |
| Treatment mean (standard deviation), Credit with Education                | -0.149                       |         | 10.074                                                                   |         | 3.564                                                                  |         | 3.961                                                               |         |
|                                                                           | (0.982)                      |         | (1.825)                                                                  |         | (3.188)                                                                |         | (3.291)                                                             |         |
| Treatment mean (standard deviation), mixed-gender group                   | -0.114                       |         | 1.151                                                                    |         | 3.650                                                                  |         | 4.032                                                               |         |
|                                                                           | (0.981)                      |         | (1.902)                                                                  |         | (3.152)                                                                |         | (3.223)                                                             |         |
| Number of observations                                                    | 3,613                        |         | 3,609                                                                    |         | 3,611                                                                  |         | 3,610                                                               |         |

CI = confidence interval. Sample contains 3,625 respondents present for the follow-up survey. Robust standard errors clustered at the village level. All specifications include three stratification variables to indicate whether a village participated in wave 1, 2, or 3. Inclusion in wave 1, 2, or 3 is nonrandom, and wave 1 treatment villages received subsidized health products, including insecticide-treated mosquito nets. The index outcome (column 1) is standardized; index component outcomes (columns 2-4) are not. Component variables of the social network score—Column 2: number of matched respondents who have given the respondent economic support, out of 10; Column 3: number of matched respondents she could ask for small money, out of 10; Column 4: number of matched respondents she would lend small money, out of 10.

SUPPLEMENTAL TABLE A9  
Social capital score

|                                                                           | (1)                                                      | (2)                                                                                       | (3)                                                                                                                     | (4)                                                                                                           | (5)                                                                                     | (6)                                                                                                              | (7)                                                                                         |
|---------------------------------------------------------------------------|----------------------------------------------------------|-------------------------------------------------------------------------------------------|-------------------------------------------------------------------------------------------------------------------------|---------------------------------------------------------------------------------------------------------------|-----------------------------------------------------------------------------------------|------------------------------------------------------------------------------------------------------------------|---------------------------------------------------------------------------------------------|
|                                                                           | Index: social capital score<br>β coefficient<br>(95% CI) | Number of community groups<br>that the respondent belongs to<br>β coefficient<br>(95% CI) | Number of groups from<br>whom the respondent got economic<br>support in the last 12 months<br>β coefficient<br>(95% CI) | Number of groups from<br>whom the respondent got advice<br>in the last 12 months<br>β coefficient<br>(95% CI) | Has spoken out in a community<br>meeting in last 12 months<br>β coefficient<br>(95% CI) | Has run for or held an<br>elected community position<br>or office in last 12 months<br>β coefficient<br>(95% CI) | Feels at least somewhat<br>influential in changing her village<br>β coefficient<br>(95% CI) |
|                                                                           | P value                                                  | P value                                                                                   | P value                                                                                                                 | P value                                                                                                       | P value                                                                                 | P value                                                                                                          | P value                                                                                     |
| Panel A: impact of mixed-gender group                                     |                                                          |                                                                                           |                                                                                                                         |                                                                                                               |                                                                                         |                                                                                                                  |                                                                                             |
| Treatment: mixed-gender group                                             | -0.171                                                   | -0.098                                                                                    | -0.031                                                                                                                  | -0.020                                                                                                        | -0.078                                                                                  | -0.023                                                                                                           | -0.062                                                                                      |
|                                                                           | 0.027                                                    | 0.062                                                                                     | 0.605                                                                                                                   | 0.778                                                                                                         | 0.011                                                                                   | 0.008                                                                                                            | 0.120                                                                                       |
| Control for stratification variables (wave)                               | (-0.322, -0.020)<br>Yes                                  | (-0.201, 0.005)<br>Yes                                                                    | (-0.150, 0.087)<br>Yes                                                                                                  | (-0.158, 0.118)<br>Yes                                                                                        | (-0.138, -0.018)<br>Yes                                                                 | (-0.040, -0.006)<br>Yes                                                                                          | (-0.141, 0.016)<br>Yes                                                                      |
| Panel B: impact of Credit with Education and/or mixed-gender treatment    |                                                          |                                                                                           |                                                                                                                         |                                                                                                               |                                                                                         |                                                                                                                  |                                                                                             |
| Treatment: Credit with Education                                          | 0.205                                                    | 0.010                                                                                     | 0.157                                                                                                                   | 0.107                                                                                                         | 0.050                                                                                   | 0.007                                                                                                            | 0.129                                                                                       |
|                                                                           | 0.064                                                    | 0.896                                                                                     | 0.062                                                                                                                   | 0.273                                                                                                         | 0.300                                                                                   | 0.601                                                                                                            | 0.018                                                                                       |
| Treatment: mixed-gender group                                             | (-0.012, 0.423)                                          | (-0.140, 0.160)                                                                           | (-0.008, 0.322)                                                                                                         | (-0.085, 0.298)                                                                                               | (-0.045, 0.145)                                                                         | (-0.019, 0.033)                                                                                                  | (0.023, 0.235)                                                                              |
|                                                                           | 0.263                                                    | 0.241                                                                                     | 0.925                                                                                                                   | 0.005                                                                                                         | 0.042                                                                                   | -0.023                                                                                                           | 0.008                                                                                       |
| Treatment: mixed-gender group                                             | (-0.288, 0.079)                                          | (-0.231, 0.059)                                                                           | (-0.144, 0.159)                                                                                                         | (-0.185, 0.195)                                                                                               | (-0.149, -0.003)                                                                        | (-0.047, 0.000)                                                                                                  | (-0.097, 0.112)                                                                             |
|                                                                           | 0.389                                                    | 0.817                                                                                     | 0.541                                                                                                                   | 0.741                                                                                                         | 0.987                                                                                   | 0.001                                                                                                            | 0.954                                                                                       |
| Treatment: education x mixed-gender group interaction                     | (-0.426, 0.167)<br>Yes                                   | (-0.232, 0.183)<br>Yes                                                                    | (-0.306, 0.161)<br>Yes                                                                                                  | (-0.322, 0.230)<br>Yes                                                                                        | (-0.120, 0.118)<br>Yes                                                                  | (-0.032, 0.034)<br>Yes                                                                                           | (-0.294, 0.014)<br>Yes                                                                      |
|                                                                           | 0.104                                                    | 0.884                                                                                     | 0.884                                                                                                                   | 1.103                                                                                                         | 0.321                                                                                   | 0.0439                                                                                                           | 0.493                                                                                       |
| Control for stratification variables (wave)                               | 0                                                        | 0.916                                                                                     | 0.754                                                                                                                   | 1.015                                                                                                         | 0.304                                                                                   | 0.0470                                                                                                           | 0.425                                                                                       |
| Control mean = credit without education, female-only (standard deviation) | (1.000)                                                  | (0.764)                                                                                   | (0.877)                                                                                                                 | (0.980)                                                                                                       | (0.460)                                                                                 | (0.212)                                                                                                          | (0.495)                                                                                     |
|                                                                           | 0.104                                                    | 0.884                                                                                     | 0.884                                                                                                                   | 1.103                                                                                                         | 0.321                                                                                   | 0.0439                                                                                                           | 0.493                                                                                       |
| Treatment mean (standard deviation), Credit with Education                | (1.005)                                                  | (0.748)                                                                                   | (0.923)                                                                                                                 | (1.003)                                                                                                       | (0.467)                                                                                 | (0.205)                                                                                                          | (0.500)                                                                                     |
|                                                                           | -0.0642                                                  | 0.828                                                                                     | 0.803                                                                                                                   | 1.049                                                                                                         | 0.253                                                                                   | 0.0283                                                                                                           | 0.427                                                                                       |
| Treatment mean (standard deviation), mixed-gender group                   | (0.940)                                                  | (0.761)                                                                                   | (0.897)                                                                                                                 | (1.004)                                                                                                       | (0.435)                                                                                 | (0.166)                                                                                                          | (0.495)                                                                                     |
|                                                                           | 3.625                                                    | 3.614                                                                                     | 3.625                                                                                                                   | 3.625                                                                                                         | 3.611                                                                                   | 3.604                                                                                                            | 3.581                                                                                       |

CI = confidence interval; ITN = insecticide-treated bednets. Sample contains 3,625 respondents present for the follow-up survey. Robust standard errors in parentheses, clustered at the village level. All specifications include three stratification variables to indicate whether a village participated in wave 1, 2, or 3. Inclusion in wave 1, 2, or 3 is nonrandom, and wave 1 treatment villages received subsidized health products, including insecticide-treated mosquito nets. The index outcome (column 1) is standardized; index component outcomes (columns 2-7) are not. Component variables of the social capital score—Column 2: number of community groups that the respondent belongs to; Column 3: number of groups from whom the respondent got economic support in the last 12 months; Column 4: number of groups from whom the respondent got advice in the last 12 months; Column 5: has spoken out in a community meeting in last 12 months; Column 6: has run for or held an elected community position or office in last 12 months; Column 7: How much influence do you think people like yourself can have in making this village/neighborhood a better place to live? = 1, if responds at least “some” or “a lot” of influence.
